# Supplementary material
Source: PubMed Central journal article supplement (PMC4319640)
Supplement: supp_the2014-0381_Supplemental_AppendixS1.pdf [file supp_the2014-0381_Supplemental_AppendixS1.pdf]

Supplemental Appendix for:

Is There a Role for Oral or Intravenous Ascorbate (Vitamin C) in Treating Patients With Cancer? A Systematic Review

Carmel Jacobs et al.

## Appendix S1. Literature Search

Database: Embase Classic+Embase <1947 to 2014 January 16>, Ovid MEDLINE(R) In-Process & Other Non-Indexed Citations and Ovid MEDLINE(R) <1946 to Present>

Search Strategy:

- 
- 1 exp Ascorbic Acid/ (114885)
  - 2 Dehydroascorbic Acid.tw. (2107)
  - 3 (ascorbic acid or vit\$ c or ascorbate).tw. (112079)
  - 4 or/1-3 (151325)
  - 5 ((cancer or neoplasm\$) adj5 (therap\$ or treatment)).tw. (429599)
  - 6 exp Neoplasms/ and (drug therapy or therapy).fs. (620062)
  - 7 5 or 6 (960241)
  - 8 4 and 7 (1920)
  - 9 randomized controlled trial.pt. (359557)
  - 10 controlled clinical trial.pt. (86972)
  - 11 random\$.ab. (1534410)
  - 12 placebo.ab. (349917)
  - 13 clinical trials as topic/ (202419)
  - 14 trial.ti. (287046)
  - 15 clinical trial\$.pt,ab. (907703)
  - 16 (phase 1 or phase 2).tw. (33867)
  - 17 exp case-control studies/ or exp cohort studies/ (1683102)
  - 18 meta analysis.mp,pt. or review.pt. or search\$.tw. (4317975)
  - 19 case reports.pt. (1650241)
  - 20 (cohort adj2 (stud\$ or analysis)).tw. (221796)
  - 21 (case adj2 (series or control\$)).tw. (257619)
  - 22 or/9-21 (9431418)
  - 23 animals/ not humans/ (5190121)
  - 24 22 not 23 (9040786)
  - 25 8 and 24 (703)
  - 26 25 use prmz (357) MEDLINE
- 
- 27 \*ascorbic acid/ (52772)
  - 28 Dehydroascorbic Acid.tw. (2107)
  - 29 (ascorbic acid or vit\$ c or ascorbate).tw. (112079)
  - 30 or/27-29 (122393)
  - 31 cancer therapy/ (49351)
  - 32 exp neoplasm/dt, th [Drug Therapy, Therapy] (1202285)
  - 33 ((cancer or neoplasm\$) adj5 (therap\$ or treatment)).tw. (429599)

34 or/31-33 (1471429)  
35 30 and 34 (2150)  
36 randomized controlled trial/ (726789)  
37 (random\$ or placebo\$).tw. (1724708)  
38 ((SINGL\$ or DOUBL\$ or TREBL\$ or TRIPL\$) adj3 (BLIND\$ or MASK\$)).tw. (297733)  
39 exp \*clinical trial/ (39427)  
40 (phase 1 or phase 2).tw. (33867)  
41 cohort analysis/ (323138)  
42 longitudinal study/ (148855)  
43 prospective study/ (613010)  
44 follow up/ (808335)  
45 (cohort adj2 (stud\$ or analysis)).tw. (221796)  
46 case control study/ (258192)  
47 case study/ (1683006)  
48 (case adj2 (series or control\$)).tw. (257619)  
49 \*case report/ (22406)  
50 meta-analys\$.mp. or search\$.tw. or review.pt. (4322481)  
51 or/36-50 (9378746)  
52 (animal\$ not human\$).sh,hw. (7712733)  
53 51 not 52 (8884482)  
54 35 and 53 (652)  
55 54 use emczd (420) EMBASE  
56 26 or 55 (777)  
57 remove duplicates from 56 (621)

\*\*\*\*\*

Database: EBM Reviews - Cochrane Central Register of Controlled Trials <December 2013>  
Search Strategy:

-----  
1 exp Ascorbic Acid/ (1470)  
2 Dehydroascorbic Acid.tw. (7)  
3 (ascorbic acid or vit\$ c or ascorbate).tw. (2398)  
4 or/1-3 (2579)  
5 ((cancer or neoplasm\$) adj5 (therap\$ or treatment)).tw. (11137)  
6 exp Neoplasms/ (39479)  
7 5 or 6 (43467)  
8 4 and 7 (141)
