# Supplementary material
Source: PubMed Central journal article supplement (PMC4319640)
Supplement: supp_the2014-0381_Supplemental_AppendixS3.pdf [file supp_the2014-0381_Supplemental_AppendixS3.pdf]

Supplemental Appendix for:  
Is There a Role for Oral or Intravenous Ascorbate (Vitamin C) in Treating Patients With Cancer? A Systematic Review  
Carmel Jacobs et al.

**Appendix S3: Summary of Risk of Bias Assessments**

| <b>Supplemental Material: Jadad Scale Risk of Bias Assessment of Randomized Controlled Trials</b>                |                                                                           |                                                                                |                                                 |                                                                            |                                 |                              |                              |                                     |
|------------------------------------------------------------------------------------------------------------------|---------------------------------------------------------------------------|--------------------------------------------------------------------------------|-------------------------------------------------|----------------------------------------------------------------------------|---------------------------------|------------------------------|------------------------------|-------------------------------------|
| <b>Study</b>                                                                                                     | <b>Study described as randomized?<br/><br/>Adequate details provided?</b> | <b>Study described as double – blinded?<br/><br/>Adequate detail provided?</b> | <b>Withdrawals appropriately accounted for?</b> | <b>Allocation concealment considered adequate, inadequate, or unclear?</b> |                                 |                              |                              |                                     |
| <b>Studies of oral ascorbate</b>                                                                                 |                                                                           |                                                                                |                                                 |                                                                            |                                 |                              |                              |                                     |
| Creagan 1979                                                                                                     | Yes / No                                                                  | Yes / Yes                                                                      | Yes                                             | Adequate                                                                   |                                 |                              |                              |                                     |
| Moertel [ 1985                                                                                                   | Yes / No                                                                  | Yes / Yes                                                                      | Yes                                             | Adequate                                                                   |                                 |                              |                              |                                     |
| Goel [1999                                                                                                       | Yes / No                                                                  | No                                                                             | No                                              | Inadequate                                                                 |                                 |                              |                              |                                     |
| <b>Studies of IV ascorbate</b>                                                                                   |                                                                           |                                                                                |                                                 |                                                                            |                                 |                              |                              |                                     |
| Ma 2014                                                                                                          | Yes / No                                                                  | No                                                                             | Yes                                             | Unclear                                                                    |                                 |                              |                              |                                     |
| <b>Studies of combined oral and IV ascorbate</b>                                                                 |                                                                           |                                                                                |                                                 |                                                                            |                                 |                              |                              |                                     |
| Zemskov 2000                                                                                                     | Yes / No                                                                  | Yes / No                                                                       | No                                              | Unclear                                                                    |                                 |                              |                              |                                     |
| <b>Supplemental Material: Newcastle Ottawa Risk of Bias Assessment of Observational Studies – cohort studies</b> |                                                                           |                                                                                |                                                 |                                                                            |                                 |                              |                              |                                     |
| <b>Study</b>                                                                                                     | <b>Representativeness of the intervention cohort</b>                      | <b>Selection of the non intervention cohort</b>                                | <b>Ascertainment of intervention</b>            | <b>Demonstration of outcome of interest not present initially</b>          | <b>Comparability of cohorts</b> | <b>Assessment of outcome</b> | <b>Follow up long enough</b> | <b>Adequacy of cohort follow up</b> |
| <b>Studies of oral ascorbate</b>                                                                                 |                                                                           |                                                                                |                                                 |                                                                            |                                 |                              |                              |                                     |
| Harris 2013                                                                                                      | Truly representative                                                      | Drawn from same community as intervention                                      | Written self report                             | Yes                                                                        | Yes                             | Self report                  | Yes                          | <20% lost to follow up              |
| <b>Studies of IV ascorbate</b>                                                                                   |                                                                           |                                                                                |                                                 |                                                                            |                                 |                              |                              |                                     |

|                                                                                                                        |                                         |                                                                        |                                       |                                        |                           |                                                |                                                                              |                                         |
|------------------------------------------------------------------------------------------------------------------------|-----------------------------------------|------------------------------------------------------------------------|---------------------------------------|----------------------------------------|---------------------------|------------------------------------------------|------------------------------------------------------------------------------|-----------------------------------------|
| Vollbr<br>acht<br>2011                                                                                                 | Selected<br>group of<br>patients        | No<br>description<br>of derivation<br>of non<br>intervention<br>cohort | Secure<br>record                      | No                                     | Not<br>compara<br>ble     | Record<br>linkage                              | Yes                                                                          | No<br>statem<br>ent                     |
| <b>Studies of combined oral and IV ascorbate</b>                                                                       |                                         |                                                                        |                                       |                                        |                           |                                                |                                                                              |                                         |
| Came<br>ron<br>1991                                                                                                    | Selected<br>group of<br>patients        | Drawn from<br>a different<br>source                                    | Secure<br>record                      | No                                     | Not<br>compara<br>ble     | Record<br>linkage                              | Yes                                                                          | No<br>statem<br>ent                     |
| <b>Supplemental Material: Newcastle Ottawa Risk of Bias Assessment of Observational Studies – case control studies</b> |                                         |                                                                        |                                       |                                        |                           |                                                |                                                                              |                                         |
| <b>Study<br/>year</b>                                                                                                  | <b>Case<br/>definition<br/>adequate</b> | <b>Representat<br/>iveness of<br/>cases</b>                            | <b>Selectio<br/>n of<br/>controls</b> | <b>Definitio<br/>n of<br/>controls</b> | <b>Compara<br/>bility</b> | <b>Ascertain<br/>ment of<br/>exposur<br/>e</b> | <b>Same<br/>method<br/>ascertai<br/>nment<br/>cases<br/>and<br/>controls</b> | <b>Non<br/>respon<br/>se rate</b>       |
| <b>Studies of combined oral and IV ascorbate</b>                                                                       |                                         |                                                                        |                                       |                                        |                           |                                                |                                                                              |                                         |
| Came<br>ron<br>1976                                                                                                    | Yes with<br>record<br>linkage           | Potential for<br>selection<br>bias not<br>stated                       | Hospital<br>controls                  | No<br>history of<br>endpoint           | Some compara<br>bility    | Secure<br>record                               | No                                                                           | No<br>design<br>ation                   |
| Came<br>ron<br>1978                                                                                                    | Yes with<br>record<br>linkage           | Potential for<br>selection<br>bias not<br>stated                       | Hospital<br>controls                  | No<br>history of<br>endpoint           | Some compara<br>bility    | Secure<br>record                               | No                                                                           | No<br>design<br>ation                   |
| Mura<br>ta<br>1982                                                                                                     | Yes with<br>record<br>linkage           | Potential for<br>selection<br>bias not<br>stated                       | Hospital<br>controls                  | No<br>descriptio<br>n of<br>source     | Some compara<br>bility    | Secure<br>record                               | No                                                                           | Non<br>respon<br>dents<br>describ<br>ed |
